## Multigene tests for breast cancer: the physician's perspective

Francesco Cognetti<sup>1</sup>, Laura Biganzoli<sup>2</sup>, Sabino De Placido<sup>3</sup>, Lucia del Mastro<sup>4</sup>, Riccardo Masetti<sup>5</sup>, Giuseppe Naso<sup>6</sup>, Giancarlo Pruneri<sup>7</sup>, Donatella Santini<sup>8</sup>, Carlo Alberto Tondini<sup>9</sup>, Corrado Tinterri<sup>10</sup>, Giuseppe Tonini<sup>11</sup> and Sandro Barni<sup>12</sup>

<sup>1</sup>Scuola di specializzazione di Oncologia, La Sapienza University, Rome, Italy

<sup>2</sup>Sandro Pitigliani Medical Oncology Department, Hospital of Prato, Prato, Italy

<sup>3</sup>Università Degli Studi di Napoli Federico II Dipartimento di Medicina clinica e Chirurgia Professore di Oncologia Medica, Napoli, Italy

<sup>4</sup>Oncology, IRCCS AOU San Martino - IST Istituto Nazionale per la Ricerca del Cancro, Genova, Italy

<sup>5</sup>Breast Center, Catholic University, Rome, Italy

<sup>6</sup>Department of Radiology, Pathology and Oncology, La Sapienza University, Rome, Italy

<sup>7</sup>Department of Pathology, Fondazione IRCCS Istituto Nazionale Tumori, Milan, Italy

<sup>8</sup>Department of Pathology, IRCCS Azienda Ospedaliera Universitaria di Bologna, Policlinico di Sant'Orsola, Bologna, Italy

<sup>9</sup>Medical Oncology, Papa Giovanni XXIII Hospital, Bergamo, Italy

<sup>10</sup>Senology Unit, Humanitas Cancer Center, Rozzano, Milan, Italy

<sup>11</sup>Medical Oncology, School University Campus Bio-Medico, Rome, Italy

<sup>12</sup>Emeritus, Department of Oncology, ASST Bergamo Ovest, Treviglio, Bergamo, Italy

**Correspondence to:** Sandro Barni, **email:** sandrobarni50@gmail.com

**Keywords:** genomic tests; breast cancer; adjuvant chemotherapy; adjuvant hormone therapy

**Received:** November 03, 2020

**Accepted:** April 01, 2021

**Published:** April 27, 2021

**Copyright:** © 2021 Cognetti et al. This is an open access article distributed under the terms of the [Creative Commons Attribution License](#) (CC BY 3.0), which permits unrestricted use, distribution, and reproduction in any medium, provided the original author and source are credited.

### ABSTRACT

**Breast cancer is the most common tumour in women and the first cause of death for cancer in the female population. Preserving the quality of life has therefore become an important objective in the management of the disease. The benefits of adjuvant chemotherapy in patients with HR+ HER2- early breast cancer should always be balanced against its potential short and long-term adverse effects, and identifying the appropriate patients for whom chemotherapy can offer the highest clinical benefit is critical. Besides clinical and pathological factors, today four multigene tests able to guide the choice of the adjuvant therapy early breast cancer are available in Italy: Oncotype DX<sup>®</sup>, EndoPredict<sup>®</sup>, MammaPrint<sup>®</sup> e Prosigna<sup>®</sup>. This review evaluates the main characteristics of these diagnostic tests, the studies on clinical utility, their economic impact and their inclusion in international and national guidelines. The Oncotype DX Breast Recurrence Score<sup>®</sup> test is the only multigene test validated, with level IA evidence, to guide the adjuvant therapy decisions: hormone therapy alone for most patients with RS results 0–25, and chemotherapy for patients with RS results 26–100. Clinical data demonstrate that the Oncotype DX test is able to significantly impact therapeutic decisions, reducing chemotherapy use up to 49% and supporting the use of chemotherapy (up to 12%) in potentially under-treated patients. Based on the level of clinical evidence and established clinical utility, several multigene tests have been included in the main international guidelines, with recommendations ranging from “strong” to “moderate”.**

## INTRODUCTION

Breast cancer is the most common cancer in women and the first cause of death for cancer in the female population [1]. Data 2015 by the World Health Organization (WHO) indicate an estimated incidence for Europe of 95 cases per 100,000 people, with a mortality rate of 23/100,000 [2]. In Italy, the new cases of breast cancer in 2019 were 53,000 [1, 3].

Breast cancer is responsible for 30% of malignant tumors in women, with a higher incidence in the younger population: 40% in women less than 50 years of age; 35% between 50 and 69 years and 22% in women over 70 years. The trend of new diagnoses is slightly increasing (+ 0.3%), due to the early screening and the decreased mortality (-0.8%), especially in younger age groups (-0.9%). As far as prevalence is concerned, in Italy about 800,000 women have a diagnosis of breast cancer: 44% of the global female population diagnosed with cancer and 24% of all prevalent cases [3]. About two-third of women with breast cancer have a positive-hormone receptor disease [4].

The number of deaths, certified by the Istituto Nazionale di Statistica (ISTAT) in 2016, was 12,000; this figure places breast cancer in first place among the causes of death for cancer in the Italian female population, regardless of age groups. The spread of the early screening significantly improved the prognosis of the disease [5, 6] and at the time being, 80% of patients diagnosed with early breast cancer have a survival > 10 years. Preserving the quality of life has therefore become an important objective in the management of the disease. To date, the burden of the disease is significant, this is also due to the side effects experienced during and after adjuvant therapies (radio-, chemo- and hormone therapy).

## DIAGNOSIS AND TREATMENT OF BREAST CANCER

The diagnosis of breast cancer is based on clinical evaluation, imaging and histopathological analysis of the tumor tissue, the latter also provides information on important prognostic factors. The main independent prognostic factors are: tumor size, lymph node status, histological grade [7, 8]. The expression of Ki67, the receptors for estrogen and progesterone (ER and PR), of HER2 (human epidermal growth factor receptor 2) and related proteins are also evaluated by immunohistochemistry. ER/PR and HER2 expression are both prognostic and predictive of the response to hormonal and anti-HER2 therapy respectively.

The treatment of early breast cancer is mainly based on locoregional surgery with or without radiotherapy. The risk of distant relapses (after 5 years) is continuous, especially in case of ER positive/HER2 negative cancers, which alone represent almost half of distant relapses [4].

To date, it is unclear whether an adjuvant chemotherapy is necessary for all these cases in order to effectively prevent these situations. An overview carried out by the Early Breast Cancer Trialists' Collaborative Group (EBCTCG) in 2012 showed that only about 10% of patients benefit from chemotherapy, but none of the classical clinical or pathological parameters allowed to identify any of these patients [9].

### Adjuvant chemotherapy in the management of early breast cancer

Cytotoxic agents inhibit molecular mechanisms responsible for cell proliferation. Therefore, the chemosensitivity strongly depends on the biology of the tumor. In patients with HR+ cancers, the analysis and the identification of the tumour gene profile is important to better predict the benefits of chemotherapy and to guide treatment decision [10]. The importance of carefully evaluating the toxicity of chemotherapy with respect to its potential benefits is linked to the possible occurrence of acute and "late" side effects arising during treatment; in some cases they can resolve within a few months of its conclusion, but many times they do not resolve, such as in case of anthracycline cardiotoxicity [11, 12].

### Impact of treatment on patients' quality of life

The consequences of both disease and treatments have a significant impact on the patient's well-being, as well as indirect implications for society, when patients have to stop work for long periods of time and bear the high costs of the treatment, which can lead to new morbidity and disability. The toxicity of chemotherapy can be particularly high, both in the short term (nausea, vomiting, anorexia, diarrhea, marrow deficit, cystitis, amenorrhea, neurotoxicity are the most commonly reported adverse events) and in the medium - long term [13]. In the latter case, adverse events are fortunately not frequent but the severity of the events is generally high. The most important events are cardiotoxicity (in particular caused by anthracycline and trastuzumab) and haematological toxicity. Cardiotoxicity can also occur very late in life. Chemotherapy can lead to a very disabling temporary or permanent condition, which have negative impact on the quality of life and consequent limitations of daily activities (work and recreation) not only of patients but also of their care givers [14, 15]. The choice of appropriate adjuvant therapy or a correct combination of adjuvant therapies is a particularly difficult challenge for clinicians. Indeed, the decision can be based on algorithms often not very applicable in clinical practice (designed on populations not representative of real-life) and/or on traditional clinical-pathological parameters, that proved to be poor in identifying patients for whom chemotherapy could be spared. Unfortunately, this often results in over-

treatment and under-treatment, with short and long term consequences on the patient's life; another added factor is the lack of an homogeneous approach to chemotherapy from both a number of cycles and dosages/types of drugs used point of view.

## MULTIGENE TESTS SUPPORTING CLINICAL DECISIONS

As already discussed, treatment decision for patients with breast cancer is based on prognostic clinical-pathological parameters (e.g., age, tumor size, presence of node metastases and histological grade), in addition to predictive factors for response to the treatment (ER/PgR and HER2). The combination of these factors in decision algorithms can support clinicians in the choice of the treatment options.

Nowadays, multigene tests able to guide the choice of the adjuvant therapy are available [16]. The expected benefit of multigene tests, when combined with clinical-pathological prognostic indicators, is to provide additional prognostic information (typically expressed in risk levels or score) in terms of clinical outcomes (development of metastases at 10 years) [17]. The use of multigene tests can result in an optimal patient selection and could avoid the toxic effects of adjuvant chemotherapy in patients who would not really benefit from it.

Four multigene tests for early breast cancer are available in Italy: *Oncotype DX*<sup>®</sup>, *EndoPredict*<sup>®</sup>, *MammaPrint*<sup>®</sup> and *Prosigna*<sup>®</sup>, validated in clinical and pharmaco-economic trials. The marketed tests are not equivalent; they have been designed to evaluate the expression of different genes and to solve different diagnostic issues. For this reason, it is not surprising that the results obtained by the various tests are not overlapping and have a relatively low concordance.

The available tests evaluate different genes with different objectives and can be classified according to their prognostic and predictive values for chemotherapy, their ability to analyze molecular subtypes, their availability (local or centralized) or on the supporting clinical evidence. One of the most important aspect of these tests is the ability to provide an estimate of the relapse risk with the hormone therapy alone (prognostic value), and to predict the benefit from chemotherapy (predictive value). The prognostic value is associated with the natural history of the disease and defines the risk of an event (e.g., distant relapse) regardless of the administered treatment.

A biomarker is considered predictive if it is associated with a clinical outcome in a treatment-dependent manner. The predictive value of a test relates to its ability to provide information on the susceptibility and resistance to a specific therapy [10]. A positive predictive value (PPV) is associated with a benefit from the treatment and a negative predictive value (NPV) is associated with an absent or unfavorable outcome obtained with a specific therapy.

## CHARACTERISTICS OF THE MULTIGENE TESTS AVAILABLE IN ITALY

As mentioned, the available multigene tests provide different information and therefore are not interchangeable. Therefore, the choice of a test for the single patient should be made according to the question to be addressed and the characteristics of the different multigene assays. These differences rely on the gene selection on the patient population used to validate the assays and importantly on their demonstrated clinical utility. The four tests available in Italy are described below.

### Oncotype DX breast recurrence score test<sup>®</sup>

- The Oncotype DX test provides two key informations: the risk of relapse of the breast cancer within 10 years (prognostic value) and the estimated outcome if treated with adjuvant chemotherapy (predictive value). The test validation included prospective randomized clinical trials elevating the level of evidence to IA.
- Description of the technology. The Oncotype DX test uses qRT-PCR technology to analyze the expression level of 21 genes on a Formalin-Fixed Paraffin-Embedded (FFPE) sample. A clinically validated algorithm, calculates an individual score on a scale from 0 to 100, based on the gene expression results. The score, expressed as a Recurrence Score<sup>®</sup> result, estimates the relapse risk within 10 years and the probability of response to chemotherapy. To date, the Oncotype DX test is available in a centralized lab: the hospital receives the sample preparation kit which is then sent to the manufacturer's central laboratory (California, USA) for the analysis.

### MammaPrint<sup>®</sup> (since 2018: MammaPrint<sup>®</sup> & BluePrint<sup>®</sup>)

- This test classifies the molecular subtype of the tumour and estimates the risk of relapse within 10 years for untreated patients and patients treated with hormone therapy alone. The test prognostic value was clinically validated in a prospective randomized trial [18, 19].
- Description of the technology. The test, based on microarray-RNA technology, analyzes the expression profile of 70 genes on a FFPE sample. The test provides a numerical index (MP index) with values ranging from -1 to +1. This value is related to a binary system of clinical risk classification (high or low). The test is performed in 2 central labs (Amsterdam – the Netherlands and California) which collect and analyze the samples. Recently, the

manufacturer also provided a kit to perform the test locally, but this kit needs the local availability of an NGS sequencer and the necessary expertise for the preparation of the samples.

### EndoPredict®

- EndoPredict® is a prognostic test that estimates the risk of relapse within 10 years and provides information on possible long-term hormone therapies (after 5 years). The test is available in Italy since 2014.
- Description of the technology. The qRT-PCR technique evaluates the expression level of 12 genes on a FFPE sample [20–23]. The molecular score of this test is then combined with the clinical characteristics of the tumor (size and lymph nodes status, providing a risk score, named the EPclin, estimating the 10-years rate of recurrence (with 5 years of hormone therapy alone). The test can be supplied as kit, if the hospital is equipped, otherwise it can be performed in a centralized laboratory in Salt Lake City (Utah, USA).

### Prosigna®

- Prosigna® is a prognostic test able to estimate the 10 years risk of relapse. This test is also used for research purposes to analyze the molecular subtypes of the tumour.
- Description of the technology. The test evaluates the the expression of 50 genes (PAM50) on a FFPE sample. The RNA extracted from the sample is processed through the nCounter Dx Analysis System (NanoString Technologies). The Prosigna® genomic score PAM50 defines a tumor subtype (Luminal A/B, Basal/like, or HER2-), and the Risk Of Recurrence (ROR) index, a value ranging from 0 to 100, is calculated by combining the genomic score analysis with a proliferation index and the size of the tumor.. The test is available as a diagnostic kit to be performed on site in equipped labs.

Table 1 compares the main characteristics of the 4 tests.

## STUDIES ON CLINICAL UTILITY AND ECONOMIC IMPACT

To be used in the clinical practice, a test need to be more precise and accurate than conventional parameters in guiding decisions regarding the use of adjuvant chemotherapy [24]. Table 2 shows the number and characteristics of clinical and economic trials of the 4 tests.

## RANDOMIZED CLINICAL TRIALS

Table 3 shows the results of the 4 published randomized controlled trials (RCT; TAILORx, NCT00310180; MINDACT, NCT00433589; RxPONDER, NCT01272037, PLAN B, NCT01049425). The trials compare the use of multigene tests with the clinical practice, evaluating the adjuvant chemotherapy in patients with early breast cancer (stage I, II or III operable) with 0–3 positives nodes, ER+ (and/or PgR-positive) and HER2-.

### PLAN B trial [25]

The prognostic value of the Oncotype DX test was confirmed by the phase III Plan B clinical trial, which evaluated 5-year survival of 3,198 patients with HR+, HER2– early breast cancer and negative and positive nodes. Patients with RS results 0–11 were treated with hormone therapy alone, while patients with RS results 12–25 were randomized to hormone therapy plus chemotherapy (with or without anthracyclines) [25, 26]. The rate disease-free survival of patients with RS results 0–11 treated with hormone therapy only was 94% both for N0 patients with high clinical risk and N1 patients.

### TAILORx trial [27–29]

The predictive value of the Oncotype DX test was validated in 10,273 node-negative patients enrolled in the prospective, randomized TAILORx (Trial Assessing Individualized Options for Treatment) clinical trial. The benefit of the test to assess value of chemotherapy was evaluated in patients with RS results 11–25 and with clinical-pathological characteristics that met the criteria for hormone-chemotherapy. The analysis showed the non-inferiority of chemotherapy added to to hormone therapy compared to hormone therapy alone (HR 1.08; 95% CI 0.94–1.24;  $p = 0.29$ ), indicating that patients with RS results 11–25 overall do not benefit from chemotherapy and can be treated with hormone therapy alone (some benefits from chemotherapy were suggested by exploratory analyses in women aged  $\leq 50$  years with RS results of 16–25) [28]. Overall, these results show that the Oncotype DX test can identify patients (about 20%) who substantially benefit from chemotherapy and patients where chemotherapy can be avoided (about 80%).

### Rx PONDER trial (<https://clinicaltrials.gov/ct2/show/record/NCT01272037>)

This phase III randomized trial is ongoing. The objective of the study is refine chemotherapy benefit according to the Recurrence Score results for 5,000 patients with HR+ HER2- breast cancer and 1–3 positive nodes, and a RS result 0–25.

**Table 1: Multigene test for identifying the gene expression of the early breast cancer**

|                                       | Oncotype DX®                                                                                                                            | MammaPrint®&BluePrint®                                                                                                                                      | EndoPredict®                                                                                                                                                  | Prosigna®                                                                                                                                                               |
|---------------------------------------|-----------------------------------------------------------------------------------------------------------------------------------------|-------------------------------------------------------------------------------------------------------------------------------------------------------------|---------------------------------------------------------------------------------------------------------------------------------------------------------------|-------------------------------------------------------------------------------------------------------------------------------------------------------------------------|
| <b>Service/Kit</b>                    | Service of centralized test**                                                                                                           | • Service of centralized test*<br>• Kit test for local use                                                                                                  | • Service of centralized test***<br>Kit test for local use                                                                                                    | Kit test for local use                                                                                                                                                  |
| <b>Objective</b>                      | Relapse risk (prognostic value) at 9 years patients treated with hormone therapy only and benefit from chemotherapy (predictive value). | Relapse risk at 5 years and benefit from chemotherapy (molecular subtype)                                                                                   | Relapse risk at 10 years from diagnosis in patients treated with hormone therapy. Information on long-term hormone therapy (>5 years).                        | Relapse risk at 10 years from diagnosis in patients treated with hormone therapy only and molecular subtype                                                             |
| <b>Number of analysed genes</b>       | <u>21 genes</u><br>(16 tumours-related and 5 reference genes)                                                                           | <u>70 genes (MammaPrint)</u><br><u>80 genes (BluePrint)</u><br>Related to several aspects of tumour biology                                                 | <u>12 genes</u><br>genes 8 tumours-related genes, 3 normalization genes and 1 control gene                                                                    | <u>58 genes</u><br>50 geni for the identification of the molecular subtype and 8 control genes                                                                          |
| <b>Analytical test</b>                | qRT-PCR                                                                                                                                 | NGS                                                                                                                                                         | qRT-PCR                                                                                                                                                       | Direct hybridization                                                                                                                                                    |
| <b>Tissue sample</b>                  | Formalin fixed and paraffine embedded (FFPE) tumour tissue                                                                              | Formalin fixed and paraffine embedded (FFPE) tumour tissue                                                                                                  | Formalin fixed and paraffine embedded (FFPE) tumour tissue                                                                                                    | Formalin fixed and paraffine embedded (FFPE) tumour tissue                                                                                                              |
| <b>Patients characteristics</b>       | Patients with ER+ HER2- early breast cancer, without nodes involvement (N-) or maximum 3 involved nodes (N1)                            | Pre- or post-menopausal women with stage I/II breast cancer, tumour volume ≤ 5 cm, ER+/ER-, without nodes involvement (N-) or maximum 3 involved nodes (N1) | Patients with ER+ HER2- early breast cancer, without nodes involvement (N-) or maximum 3 involved nodes (N1) during hormone adjuvant therapy                  | Post-menopausal women with ER+/PgR+, HER2- breast cancer, without nodes involvement (stage I or II) or maximum 3 involved nodes (stage II or IIIa)                      |
| <b>Test results</b>                   | Continuous value<br>Recurrence Score results                                                                                            | Continuous value (plus tumour subtype)<br>MP index                                                                                                          | Continuous value<br>Molecular score (based on level of gene expression)<br>EPclin score (a combination of molecular score and tumour volume and nodes status) | Continuous value<br>Molecular subtype<br>Risk of Recurrence (ROR)<br>Score (a combination of genetic and clinical data)                                                 |
| <b>Classification of relapse risk</b> | Different intervals and risk cut-offs based on nodes involvement and patient's age                                                      | Low risk****<br>High risk****                                                                                                                               | EPclin = 3,3 (cut-off for high and low risk)                                                                                                                  | <i>Any node involved:</i><br>• 0–40 = Low Risk<br>• 41–60 = Intermediate Risk<br>• 61–100 = High Risk<br><i>1–3 nodes:</i><br>• 0–40 = Low Risk<br>• 41–100 = High Risk |

\*Two labs: one in Europe (Amsterdam) and the other in USA (Irvine, California). \*\*One lab in USA (Redwood City, California). \*\*\*One lab in Salt Lake City (Utah, USA). \*\*\*\*The Manufacturer states that in case of MPI index values near to cut-off ( $\pm 0.050$ ), the accuracy of the classification is < 90%. Abbreviations: ER, estrogen receptor; FFPE, formalin fixed and paraffine embedded; HER2, human epidermal growth factor receptor 2; NGS, Next Generation Sequencing; PgR, progesterone receptor; qRT-PCR, quantitative reverse transcription polymerase chain reaction.

## MINDACT trial [19]

The potential prognostic value of the MammaPrint® test was evaluated by the MINDACT trial in 6,693 women with operable pT1-2 or T3, N0 or N+ (up to 3 lymph nodes) breast cancer. The primary endpoint was the distant metastasis free survival, of high-clinical risk patients and a low MammaPrint score profile, treated without chemotherapy ( $n = 644$ ). Among the secondary endpoints, the study showed that high-clinical risk and low-MammaPrint risk patients randomized to chemotherapy had limited additional therapeutic benefits from adjuvant chemotherapy.

## COMPARATIVE TRIALS

Trials comparing multigene tests showed that they are not interchangeable.

- TransATAC [30]. A retrospective analysis on 774 biopsy samples of post-menopausal women with ER+ HER2- breast cancer treated for 5 years with tamoxifen or anastrozole and enrolled in the ATAC study, compared the prognostic value of 6 tests: Oncotype DX, Prosigna, EndoPredict, Breast Cancer Index (BCI), Clinical Treatment Score and immunohistochemistry with 4-markers. This analysis revealed different prognostic value of the assays.
- OPTIMAPrelim trial [31]. The study was performed in 35 UK hospitals and evaluated the results of 3 multigene tests (Oncotype DX, MammaPrint and Prosigna) on patients > 40 years with HR+/HER2- early breast cancer and node involvement (1 to 9) or, alternatively, tumour size > 3 cm and N0. The results showed that when assessed on the same patient samples each test provides different risks estimates.

**Table 2: Characteristics of the different clinical and economic trials for the 4 multigene tests and score for the early breast cancer**

|                     | Oncotype DX test           | MammaPrint                 | EndoPredict (EP) | PAM50/Prosigna |
|---------------------|----------------------------|----------------------------|------------------|----------------|
| Clinical validation | 20 trials: A(2) B(8) D(10) | 21 trials: A(1) C(3) D(17) | 4 trials B(4)    | 5 trials B(5)  |
| Clinical usefulness | 22 trials                  | 4 trials                   | 1 trial          | 1 trial        |
| Economic evaluation | 32 evaluations             | 7 evaluations              | 1 evaluation     | –              |

(A) prospective trial; (B) prospective trial on file samples; (C) prospective real-life trial; (D) retrospective real-life trial [24].

**Table 3: Characteristics and outcomes of phase III randomized clinical trials on the clinical use of multigene tests approved in Italy**

| Trial                                                        | Enrolled population                                                                                                                                      | Primary endpoint                                                                                                                                                                                                                                                                                                                                | Secondary endpoints                                                                                                                                                                                                                          |
|--------------------------------------------------------------|----------------------------------------------------------------------------------------------------------------------------------------------------------|-------------------------------------------------------------------------------------------------------------------------------------------------------------------------------------------------------------------------------------------------------------------------------------------------------------------------------------------------|----------------------------------------------------------------------------------------------------------------------------------------------------------------------------------------------------------------------------------------------|
| <b>TAILORx</b><br>[27, 28, 29]<br>(f-up: 9 years)            | <i>N</i> = 10273; ER+ and/or PgR+, HER2- early breast cancer (stage IA-IIIB, LN 0-3) with positive nodes,<br>Treatment: hormone vs chemo-hormone therapy | <b>Disease-free survival:</b> <ul style="list-style-type: none"> <li>HR 1.08 (95% CI, 0.94–1.24; <i>P</i> = 0.26)</li> <li>Disease-free survival at 9 years: 83.3% and 84.3%</li> <li>The benefit from CT ranged with combination of RS and age (<i>P</i> = 0.004),</li> <li>The benefit from CT in women ≤ 50 years with a 16–25 RS</li> </ul> | <ul style="list-style-type: none"> <li><b>No distant relapses</b> (94.5% vs 95.0%)</li> <li><b>Absence of distant or locoregional relapses</b> (92.9% vs 92,9%)</li> <li><b>Overall survival</b> (93.9 vs 93.8)</li> </ul>                   |
| <b>MINDACT [19]</b><br>(f-up: 5 years)                       | <i>N</i> = 6693; early breast cancer (stage T1, T2 or T3 operable; LN 0–3).<br>Treatment: hormone vs chemo-hormone therapy                               | <b>Relapse-free survival rate at 5 years</b> <ul style="list-style-type: none"> <li>94.7% (95% CI: 92.5–96.2) for HT only.</li> <li>The difference for HT arm and HT + CT arm was 1,5 points (lower rate for HT only)</li> </ul>                                                                                                                | <b>Survival and disease-free survival in patients after classification of relapse risk (clinical criteria and 70 gene multigene test)</b><br>Not complete concordance                                                                        |
| <b>RxPONDER (planned f-up: 15 years. ongoing: 2001–2022)</b> | ER+ HER2- early breast cancer, RS < 25<br>Treatment: hormone vs chemo-hormone therapy                                                                    | <b>Interaction between RS and benefit from CT</b>                                                                                                                                                                                                                                                                                               | <ul style="list-style-type: none"> <li><b>Overall survival</b></li> <li><b>Distant disease-free survival (DFS)</b></li> <li><b>Local disease-free interval</b></li> <li><b>Toxicity according NCI-CTCAE standard, version 4.0</b></li> </ul> |
| <b>PLAN B [25, 26]</b>                                       | HR-/HER2 LN 0-3 early breast cancer<br>Treatment: hormone therapy vs different CT regimens (with or without antracyclines)                               | <b>Disease-free survival in patients with RS &gt; 12 treated with a combination and with RS 0-11 treated with HT only</b> <ul style="list-style-type: none"> <li>94%</li> </ul>                                                                                                                                                                 |                                                                                                                                                                                                                                              |

Abbreviations: CT, chemotherapy; ER, estrogen receptor; f-up, follow-up; HER2, human epidermal growth factor receptor 2; HR, hazard ratio; HT, hormone therapy; CI, confidence interval; LN, lymph node; NCI-CTCAE, National Cancer Institute Common Terminology Criteria for Adverse. Events. Only Oncotype DX (3 trials) and Mappaprint (1 trial) test were evaluated in phase III randomized trials.

- An analysis on 38 trials, presented at the ASCO Congress 2018, compared the clinical utility of 4 multigene tests on the use of chemotherapy in

patients with ER+ early breast cancer and node negative. The results of this analysis are reported in Table 4 [32].

**Table 4: Comparative analysis of the outcomes of multigene test on chemotherapy use [32]**

|                                | No test  | EndoPredict | MammaPrint | Oncotype DX test | Prosigna |
|--------------------------------|----------|-------------|------------|------------------|----------|
| CT use, %                      | 51       | 56          | 64         | 31               | 49       |
| DR over 10 years, <i>n</i>     | 271      | 259         | 269        | 241              | 273      |
| ED + H over 10 years, <i>n</i> | 2260     | 2274        | 2435       | 1630             | 2113     |
| 10-year total cost of care     | \$72.9 M | \$95.1 M    | \$102.2 M  | \$67.5 M         | \$88.0 M |

Abbreviations: CT: Chemotherapy; DR: distant relapse; ED + H: Emergence Department + Hospitalization.

## REAL-LIFE REGISTRIES

The real-life data from registries provide additional information to those of RCT.

### TRANSBIG registry

From 2004 to 2011, the registry enrolled patients with breast cancer. Biopsy samples of 307 patients  $\leq$  60 years with ER+ (71%) or ER- (29%) breast cancer who did not receive adjuvant therapy [33] were selected and analyzed with the MammaPrint test. 90% of low risk patients were metastases-free after 10 years, as well as 69% of high risk patients.

### SEER registry (Surveillance, Epidemiology, and End Results Registry)

An observational study on 80,605 patients with HR+, HER2- breast cancer and node-negative or node-positive (up to 3) confirmed that patients with low Recurrence Score results with the the Oncotype DX® test have excellent clinical outcome when receiving hormone therapy alone [34].

### CLALIT registry

Data from the Clalit registry, the largest health organization in Israel which approved the reimbursement of the Oncotype DX multigene test for patients with HR+ breast cancer, were separately analyzed for node-negative and node-positive. The results from the 1801 N0 patients supports evidence from the prospective TAILORx trial [35, 36]. With regard to node-positive patients ( $n = 755$ ), the results support the use of the endocrine therapy alone in patients with ER+ HER2- N1 breast cancer for patients with RS results 0–17.

### PONDx clinical-practice study

1,738 patients from 27 Italian centers in 6 regions (Lombardy, Lazio, Campania, Abruzzo, Marche and Emilia Romagna) were enrolled in this study. The objective was to define the impact of the Oncotype DX test on the decision to use chemotherapy and to identify patients who can really benefit from testing. The results confirmed that the Oncotype DX Breast Recurrence Score

test substantially impacted treatment decisions: the test reduced chemotherapy use by up to 49% and supported the use of chemotherapy by up to 12%. Overall, a large reduction in the use of adjuvant chemotherapy was observed, despite it was recommended initially for only 31% of patients. The re-evaluation of PONDx results in light of the publication of TAILORx showed that the treatment with hormone therapy alone could be possible in 75% of cases. Such treatment changes could potentially lead to saving for the health care system and increase the quality of life of patients [37].

## EVALUATION OF THE ECONOMIC IMPACT OF MULTIGENE TESTS

The availability of multigene tests and the supporting results from clinical practice and randomized trials highlight the importance of their use to support and complement the traditional clinical parameters. However, the cost of these assays is not irrelevant: for this reason, it is essential to make an accurate assessment of the clinical situations where their use is most appropriate [38–41].

A recent systematic review [24] analyzed four criteria related to the evaluation of the value to be attributed to MammaPrint®, Oncotype DX®, Prosigna® and EndoPredict® genomic tests: methodology and test development, clinical validation, clinical utility and the economic value of multigene prognostic tests. The review by Blok et al. is based on 44 studies, most of them (32 studies) on the Oncotype DX test. Most trials evaluated the test against alternative decision-making strategies; only 2 trials evaluated patient groups, the remaining 42 trials used a mathematical model. Considering the improvement in patient outcomes, multigene assays were found to be cost effective in 90% of the included studies, not exceeding the €40,000 cut-off per earned QALY (Qualitative Adjusted Life-Year).

## INCLUSION OF MULTIGENE TESTS IN CLINICAL GUIDELINES

Due to the strength of data and the clinical utility, the multigene tests have been included in the main international guidelines [42]. The AIOM 2019 guidelines [3] describe the use of Molecular Multigene Prognostic

**Table 5: Guidelines recommendations on multigene tests for the therapeutic decisions in early breast cancer**

| Guidelines                       | Oncotype DX®                                                                                                                                                                                                   | EndoPredict®                                                                                                                                                                               | Prosigna®                                                                                                                                                                                  | MammaPrint®                                                                                                                                                                               |
|----------------------------------|----------------------------------------------------------------------------------------------------------------------------------------------------------------------------------------------------------------|--------------------------------------------------------------------------------------------------------------------------------------------------------------------------------------------|--------------------------------------------------------------------------------------------------------------------------------------------------------------------------------------------|-------------------------------------------------------------------------------------------------------------------------------------------------------------------------------------------|
| <b>IQWiG (Germany) 2020 [43]</b> | <b>Yes</b> (predictive & prognostic) – indicated for: ER+, HER2-, N0 invasive early breast cancer                                                                                                              | <b>No</b> (the Oncotype DX values cannot be translated to other tests)                                                                                                                     | <b>No</b> (the Oncotype DX values cannot be translated to other tests)                                                                                                                     | <b>No</b> (the Oncotype DX values cannot be translated to other tests)                                                                                                                    |
| <b>NICE (UK) 2018 [44]</b>       | <b>Predictive &amp; prognostic</b><br>Predictive for: ER+, HER2-, N0 eBC<br>Prognostic for: ER+, HER2-, N0/N1 eBC (pre and post-menopausal)                                                                    | <b>Prognostic</b><br>indicated for: invasive ER+, HER2-, N0/N1 eBC (pre e post-menopausal)                                                                                                 | <b>Prognostic</b><br>indicated for: ER+, HER2-, N0/N1 eBC (post-menopausal only)                                                                                                           | <b>Considered non “cost effective”</b>                                                                                                                                                    |
| <b>St. Gallen (EU) 2019 [45]</b> | <ul style="list-style-type: none"> <li>• <b>Specific strong recommendation</b> for T1–T3 N0 patients (TAILORx cut-offs)</li> <li>• Generic strong recommendation for the use of CT in TxN1 patients</li> </ul> | <b>Generic recommendation</b> (all MGAs are strongly recommended for the use of CT in T1–T3 N0 & TxN1 patients)                                                                            | <b>Generic recommendation</b> (all MGAs are strongly recommended for the use of CT in T1–T3 N0 & TxN1 patients)                                                                            | <b>Generic recommendation</b> (all MGAs are strongly recommended for the use of CT in T1–T3 N0 & TxN1 patients)                                                                           |
| <b>ESMO (EU) 2019 [46]</b>       | Level of Evidence & Grade of Recommendation (GoR): <b>1,A</b> (ER+, HER2-, N0/N1)                                                                                                                              | Level of Evidence & GoR: <b>1,B</b> (ER+, HER2-, N0/N1)                                                                                                                                    | Level of Evidence & GoR: <b>1,B</b> (ER+, HER2-, N0/N1)                                                                                                                                    | Level of Evidence & GoR: <b>1,A</b> (ER+, HER2-, N0/N1)                                                                                                                                   |
| <b>AJCC (US) 2017 [47]</b>       | <b>Level 1</b>                                                                                                                                                                                                 | <b>Level 2</b>                                                                                                                                                                             | <b>Level 2</b>                                                                                                                                                                             | <b>Level 2</b>                                                                                                                                                                            |
| <b>ASCO (US) 2019 [29]</b>       | <b>Strong</b><br>Quality of Evidence (EQ): high<br>TAILORx cut-offs (ER/PgR+, HER2-, N0)                                                                                                                       | <b>Moderate</b><br>EQ: intermediate<br>(ER/PgR+, HER2-, N0)                                                                                                                                | <b>Strong</b><br>EQ: high<br>(ER/PgR+, HER2-, N0)                                                                                                                                          | <b>Strong</b><br>EQ: high<br>For high risk patients only                                                                                                                                  |
| <b>NCCN (US) 2020 [48]</b>       | <ul style="list-style-type: none"> <li>• Predictive: <b>Yes</b></li> <li>• Prognostic: <b>Yes</b></li> <li>• NCCN category: <b>Preferred</b></li> <li>• Level of Evidence: <b>1</b></li> </ul>                 | <ul style="list-style-type: none"> <li>• Predictive: <b>No</b></li> <li>• Prognostic: <b>Yes</b></li> <li>• NCCN category: <b>Other</b></li> <li>• Level of Evidence: <b>2A</b></li> </ul> | <ul style="list-style-type: none"> <li>• Predictive: <b>No</b></li> <li>• Prognostic: <b>Yes</b></li> <li>• NCCN category: <b>Other</b></li> <li>• Level of Evidence: <b>2A</b></li> </ul> | <ul style="list-style-type: none"> <li>• Predictive: <b>No</b></li> <li>• Prognostic: <b>Yes</b></li> <li>• NCCN category: <b>Other</b></li> <li>• Level of Evidence: <b>1</b></li> </ul> |
| <b>AIOM (Italy) 2019 [3]</b>     | <b>Prospective validation with RCTs</b>                                                                                                                                                                        | <b>Retrospective validation</b>                                                                                                                                                            | <b>Retrospective validation</b>                                                                                                                                                            | <b>Prospective validation with RCTs</b>                                                                                                                                                   |
| <b>AgeNaS (Italy) 2019 [49]</b>  | <b>Predictive and prognostic value</b><br>(ER+, HER2-, N-, N1 for pre and post-menopausal patients)                                                                                                            | <b>Prognostic value</b><br>(ER+, HER2-, N-, N1 for pre and post-menopausal patients)                                                                                                       | <b>Valore prognostico</b> and molecular subtype (for post-menopausal patients only)                                                                                                        | <b>Predictive and prognostic value</b> with molecular subtype (for stage I/II T1–T2 patients only)                                                                                        |

Abbreviations: CT, chemotherapy; eBC, early breast cancer; EQ, Quality of Evidence; ER, hormonal receptor; GoR, Grade of Recommendation; HER2, human epidermal growth factor receptor 2; MGAs, multigene assays; PgR, progesterone receptor; RCT, randomized controlled trial.

Tumor Molecular Tests (TMMP, Table 5); however, in Italy, these tests are not yet included in the Livelli Essenziali di Assistenza (Essential Assistance Levels, LEA) and therefore are not reimbursed; they are used without specific institutional rules, but on the basis of the clinical needs of individual cases and the possibility for patients to directly cover their cost, with the exception of Lombardy Region, where the 4 tests are reimbursed if used to solve therapeutic questions in patients whose disease characteristics make the choice particularly complex. Therefore, this problem needs to be solved, also in light of the recent document: “Multigene prognostic tests to guide the decision on adjuvant chemotherapy in the treatment of early stage breast cancer”, where the Agenzia Nazionale per i Servizi Sanitari Regionali (AgeNaS) gives a positive opinion on the clinical utility of multigene tests, taking into account the indications and considerations of the EUnetHTA report 2018. The Italian Ministry of Health

should therefore take charge of raising the issue of fair access of patients to multigene tests, in order to include them in LEAs with a national reimbursement. All major tests are considered by international guidelines, whose recommendations range from “strong” to “moderate” depending on the quality of evidence and the type of studies (prospective or retrospective).

## CONCLUSIONS

The benefits of adjuvant chemotherapy in patients with HR+ HER2- early breast cancer should always be balanced against its potential short and long-term adverse effects. For this reason, it is essential to identify the appropriate patients where this therapeutic approach can offer the highest clinical benefit.

The clinical and pathological factors are exclusively prognostic and are not able to predict the benefit related



to chemotherapy. Consequently, in most cases of luminal disease (ER+/HER2-), the traditional parameters are not sufficient to reliably identify patients who benefit from the hormone therapy alone compared to those for whom a combined hormone-chemotherapy is indicated. Multigene tests, which have demonstrated greater efficacy and reproducibility, can be used for these “intermediate risk” patients. Studies comparing different multigene tests showed that they are not interchangeable, as they provide different and inconsistent results. It is therefore essential to recognize the potential and limitations of each test, in order to choose the best test for the appropriate patient and for the appropriate question.

To date, the Oncotype DX Breast Recurrence Score test is the only validated multigene test, with a IA level of evidence, as actionable test (i.e., suitable to guide therapeutic choice), to support the use of hormone therapy alone, or chemo-endocrine therapy. The PONDx study confirmed that the Oncotype DX test is able to significantly impact therapeutic decisions, reducing the use of chemotherapy (over-treatment) up to 49% and, at the same time, supporting the use of chemotherapy (up to 12%) in potentially under-treated patients. The MammaPrint® test has been validated with prospective evidence supporting its prognostic value, and the actual guidelines only recognize its prognostic validity. Some HTA analysis raised some issues about the cost-effectiveness of the test.

The EndoPredict® and Prosigna® tests are validated only on retrospective trials, although more extensive studies supporting their prognostic value are ongoing. More specifically, EndoPredict® is able to estimate the long-term risk of relapse, information particularly useful when the hormone therapy is prolonged beyond 5 years. On the other hand, Prosigna®, other than defining the 10-year relapse risk, is also used in research for the analysis of the molecular subtypes of breast cancer.

Due to the level of clinical evidence and the clinical utility, multigene tests have been included in the main international guidelines, with recommendations ranging from “strong” to “moderate” depending on the level of evidence, as well as the characteristics of the different tests.

Based on the high scientific evidence, several European health care systems approved the integration of these tests in the clinical pathway and reimbursement for breast cancer patients. A rapid introduction of multigene tests in the LEAs, in order to allow all Italian women to obtain the same treatment opportunity, is desirable.

## Abbreviations

AgeNaS: Agenzia Nazionale per i Servizi Sanitari Regionali; ASCO: American Society of Clinical Oncology; CI: confidence interval; CT: chemotherapy; DR: distant relapse; eBC: early breast cancer; EBCTCG: Early Breast Cancer Trialists’ Collaborative Group; ED + H: Emergence

Department + Hospitalization; EQ: Quality of Evidence; ER: estrogen receptor; ESMO: European Society for Medical Oncology; FDA: Food and Drug Administration; FFPE: Formalin-Fixed Paraffin-Embedded; f-up: follow-up; GoR: Grade of Recommendation; HER2: Human epidermal growth factor receptor 2; HR: Hazard Ratio; HT: Hormone therapy; IQWiG: Institute for Quality and Efficiency in Healthcare; ISTAT: Istituto Nazionale di Statistica; LEA: Livelli Essenziali di Assistenza; LN: lymph node; MGAs: multigene assays; NCCN: National Comprehensive Cancer Network; NCI-CTCAE: National Cancer Institute Common Terminology Criteria for Adverse Events; NGS: Next Generation Sequencing; NICE: National Institute for Health and Care Excellence; NPV: Negative Predictive Value; PPV: Positive Predictive Value; PgR: Progesteron receptor; QALY: Qualitative Adjusted Life-Year; qRT-PCR: quantitative Reverse Transcription Polymerase Chain Reaction; RCT: Randomized Controlled Trial; RS: Recurrence Score; RT-PCR: Reverse Transcription Polymerase Chain Reaction; TMMP: Test Molecolari Multigenici Prognostici di Tumori; WHO: World Health Organization.

## Author contributions

All authors contributed towards data analysis, drafting and critically revising the paper, gave final approval of the version to be published, and agreed to be accountable for all aspects of the work.

## CONFLICTS OF INTEREST

Sandro Barni received honoraria from Roche, Italfarmaco, Eisai, Mylan, Leo Pharma, Genomic Health, Pharmanutra, Kyowa Kyrin. Laura Biganzoli received honoraria from AstraZeneca, Celgene, Daiichi-Sankyo, Eisai, Genomic Health, Ipsen, Lilly, Novartis, Pfizer, Pierre Fabre, Roche and has institutional financial interests with Celgene, Genomic Health, Novartis. Carlo Alberto Tondini received honoraria from Genomic Health/Exact Science and Myriad; reasearch grants from Genomic Health. Giuseppe Tonini received honoraria from Molteni, Novartis, Pharmamar, Lilly. All the other Authors have no conflicts of interest to declare.

## FUNDING

Medical writing assistance was provided by Editree. Support for this project was provided by Genomic Health, Inc.

## REFERENCES

1. AIRTUM. I numeri del cancro in Italia 2020. [https://www.registri-tumori.it/cms/sites/default/files/publicazioni/new\\_NDC2020-operatori-web.pdf](https://www.registri-tumori.it/cms/sites/default/files/publicazioni/new_NDC2020-operatori-web.pdf).

2. European Commission Cancer statistics 2018. [http://ec.europa/eurostat/statistics-explained/index.php/Cancer\\_statistics](http://ec.europa/eurostat/statistics-explained/index.php/Cancer_statistics).
3. Linee guida AIOM 2019. Neoplasie della mammella. [https://www.aiom.it/wp-content/uploads/2019/10/2019\\_LG\\_AIOM\\_Mammella.pdf](https://www.aiom.it/wp-content/uploads/2019/10/2019_LG_AIOM_Mammella.pdf).
4. Sparano JA, Gray RJ, Makower DF, Pritchard KI, Albain KS, Hayes DF, Geyer CE Jr, Dees EC, Perez EA, Olson JA Jr, Zujewski J, Lively T, Badve SS, et al. Prospective Validation of a 21-Gene Expression Assay in Breast Cancer. *N Engl J Med*. 2015; 373:2005–14. <https://doi.org/10.1056/NEJMoa1510764>. [PubMed]
5. Jatoi I, Miller AB. Why is breast-cancer mortality declining? *Lancet Oncol*. 2003; 4:251–54. [https://doi.org/10.1016/S1470-2045\(03\)01037-4](https://doi.org/10.1016/S1470-2045(03)01037-4). [PubMed]
6. Smigal C, Jemal A, Ward E, Cokkinides V, Smith R, Howe HL, Thun M. Trends in breast cancer by race and ethnicity: update 2006. *CA Cancer J Clin*. 2006; 56:168–83. <https://doi.org/10.3322/canjclin.56.3.168>. [PubMed]
7. Chia SK, Speers CH, Bryce CJ, Hayes MM, Olivotto IA. Ten-year outcomes in a population-based cohort of node-negative, lymphatic, and vascular invasion- negative early breast cancers without adjuvant systemic therapies. *J Clin Oncol*. 2004; 22:1630–37. <https://doi.org/10.1200/JCO.2004.09.070>. [PubMed]
8. Leitner SP, Swern AS, Weinberger D, Duncan LJ, Hutter RV. Predictors of recurrence for patients with small (one centimeter or less) localized breast cancer (T1a,b N0 M0). *Cancer*. 1995; 76:2266–74. [https://doi.org/10.1002/1097-0142\(19951201\)76:11<2266::AID-CNCR2820761114>3.0.CO;2-T](https://doi.org/10.1002/1097-0142(19951201)76:11<2266::AID-CNCR2820761114>3.0.CO;2-T).
9. Peto R, Davies C, Godwin J, Gray R, Pan HC, Clarke M, Cutter D, Darby S, McGale P, Taylor C, Wang YC, Bergh J, Di Leo A, et al, and Early Breast Cancer Trialists' Collaborative Group (EBCTCG). Comparisons between different polychemotherapy regimens for early breast cancer: meta-analyses of long-term outcome among 100,000 women in 123 randomised trials. *Lancet*. 2012; 379:432–44. [https://doi.org/10.1016/S0140-6736\(11\)61625-5](https://doi.org/10.1016/S0140-6736(11)61625-5). [PubMed]
10. Kim SR, Paik S. Genomics of adjuvant therapy for breast cancer. *Cancer J*. 2011; 17:500–04. <https://doi.org/10.1097/PPO.0b013e31823e5370>. [PubMed]
11. Tao JJ, Visvanathan K, Wolff AC. Long term side effects of adjuvant chemotherapy in patients with early breast cancer. *Breast*. 2015 (Suppl 2); 24:S149–53. <https://doi.org/10.1016/j.breast.2015.07.035>. [PubMed]
12. Partridge AH, Burstein HJ, Winer EP. Side effects of chemotherapy and combined chemohormonal therapy in women with early-stage breast cancer. *J Natl Cancer Inst Monogr*. 2001; 2001:135–42. <https://doi.org/10.1093/oxfordjournals.jncimonographs.a003451>. [PubMed]
13. Azim HA Jr, de Azambuja E, Colozza M, Bines J, Piccart MJ. Long-term toxic effects of adjuvant chemotherapy in breast cancer. *Ann Oncol*. 2011; 22:1939–47. <https://doi.org/10.1093/annonc/mdq683>. [PubMed]
14. Conner-Spady BL, Cumming C, Nabholz JM, Jacobs P, Stewart D. A longitudinal prospective study of health-related quality of life in breast cancer patients following high-dose chemotherapy with autologous blood stem cell transplantation. *Bone Marrow Transplant*. 2005; 36:251–59. <https://doi.org/10.1038/sj.bmt.1705032>. [PubMed]
15. Drolet M, Maunsell E, Mondor M, Brisson C, Brisson J, Mâsse B, Deschênes L. Work absence after breast cancer diagnosis: a population-based study. *CMAJ*. 2005; 173:765–71. <https://doi.org/10.1503/cmaj.050178>. [PubMed]
16. Güler EN. Gene Expression Profiling in Breast Cancer and Its Effect on Therapy Selection in Early-Stage Breast Cancer. *Eur J Breast Health*. 2017; 13:168–74. <https://doi.org/10.5152/ejbh.2017.3636>. [PubMed]
17. Reis-Filho JS, Pusztai L. Gene expression profiling in breast cancer: classification, prognostication, and prediction. *Lancet*. 2011; 378:1812–23. [https://doi.org/10.1016/S0140-6736\(11\)61539-0](https://doi.org/10.1016/S0140-6736(11)61539-0). [PubMed]
18. van 't Veer LJ, Dai H, van de Vijver MJ, He YD, Hart AA, Mao M, Peterse HL, van der Kooy K, Marton MJ, Witteveen AT, Schreiber GJ, Kerkhoven RM, Roberts C, et al. Gene expression profiling predicts clinical outcome of breast cancer. *Nature*. 2002; 415:530–36. <https://doi.org/10.1038/415530a>. [PubMed]
19. Cardoso F, van't Veer LJ, Bogaerts J, Slaets L, Viale G, Delaloge S, Pierga JY, Brain E, Causeret S, DeLorenzi M, Glas AM, Goulinopoulos V, Goulioti T, et al, and MINDACT Investigators. 70-Gene Signature as an Aid to Treatment Decisions in Early-Stage Breast Cancer. *N Engl J Med*. 2016; 375:717–29. <https://doi.org/10.1056/NEJMoa1602253>. [PubMed]
20. Sestak I. Risk stratification in early breast cancer in premenopausal and postmenopausal women: integrating genomic assays with clinicopathological features. *Curr Opin Oncol*. 2019; 31:29–34. <https://doi.org/10.1097/CCO.0000000000000490>. [PubMed]
21. Buus R, Sestak I, Kronenwett R, Denkert C, Dubsy P, Krappmann K, Scheer M, Petry C, Cuzick J, Dowsett M. Comparison of EndoPredict and EPclin With Oncotype DX Recurrence Score for Prediction of Risk of Distant Recurrence After Endocrine Therapy. *J Natl Cancer Inst*. 2016; 108:djw149. <https://doi.org/10.1093/jnci/djw149>. [PubMed]
22. Martin M, Brase JC, Calvo L, Krappmann K, Ruiz-Borrego M, Fisch K, Ruiz A, Weber KE, Munarriz B, Petry C, Rodriguez CA, Kronenwett R, Crespo C, et al. Clinical validation of the EndoPredict test in node-positive, chemotherapy-treated ER+/HER2- breast cancer patients: results from the GEICAM 9906 trial. *Breast Cancer Res*. 2014; 16:R38. <https://doi.org/10.1186/bcr3642>. [PubMed]
23. Filipits M, Rudas M, Jakesz R, Dubsy P, Fitzal F, Singer CF, Dietze O, Greil R, Jelen A, Sevelka P, Freibauer C, Müller V, Jänicke F, et al, and EP Investigators. A new

- molecular predictor of distant recurrence in ER-positive, HER2-negative breast cancer adds independent information to conventional clinical risk factors. *Clin Cancer Res.* 2011; 17:6012–20. <https://doi.org/10.1158/1078-0432.CCR-11-0926>. [PubMed]
24. Blok EJ, Bastiaannet E, van den Hout WB, Liefers GJ, Smit VTHBM, Kroep JR, van de Velde CJH. Systematic review of the clinical and economic value of gene expression profiles for invasive early breast cancer available in Europe. *Cancer Treat Rev.* 2018; 62:74–90. <https://doi.org/10.1016/j.ctrv.2017.10.012>. [PubMed]
  25. Nitz U, Gluz O, Christgen M, Kates RE, Clemens M, Malter W, Nuding B, Aktas B, Kuemmel S, Reimer T, Stefek A, Lorenz-Salehi F, Krabisch P, et al. Reducing chemotherapy use in clinically high-risk, genomically low-risk pN0 and pN1 early breast cancer patients: five-year data from the prospective, randomised phase 3 West German Study Group (WSG) PlanB trial. *Breast Cancer Res Treat.* 2017; 165:573–83. <https://doi.org/10.1007/s10549-017-4358-6>. [PubMed]
  26. Gluz O, Nitz UA, Christgen M, Kates RE, Shak S, Clemens M, Kraemer S, Aktas B, Kuemmel S, Reimer T, Kusche M, Heyl V, Lorenz-Salehi F, et al. West German Study Group Phase III PlanB Trial: First Prospective Outcome Data for the 21-Gene Recurrence Score Assay and Concordance of Prognostic Markers by Central and Local Pathology Assessment. *J Clin Oncol.* 2016; 34:2341–49. <https://doi.org/10.1200/JCO.2015.63.5383>. [PubMed]
  27. Sparano JA, Paik S. Development of the 21-gene assay and its application in clinical practice and clinical trials. *J Clin Oncol.* 2008; 26:721–8. <https://doi.org/10.1200/JCO.2007.15.1068>. [PubMed]
  28. Sparano JA, Gray RJ, Makower DF, Pritchard KI, Albain KS, Hayes DF, Geyer CE Jr, Dees EC, Goetz MP, Olson JA Jr, Lively T, Badve SS, Saphner TJ, et al. Adjuvant Chemotherapy Guided by a 21-Gene Expression Assay in Breast Cancer. *N Engl J Med.* 2018; 379:111–21. <https://doi.org/10.1056/NEJMoa1804710>. [PubMed]
  29. Andre F, Ismaila N, Henry NL, Somerfield MR, Bast RC, Barlow W, Collyar DE, Hammond ME, Kuderer NM, Liu MC, Van Poznak C, Wolff AC, Stearns V. Use of Biomarkers to Guide Decisions on Adjuvant Systemic Therapy for Women With Early- Stage Invasive Breast Cancer: ASCO Clinical Practice Guideline Update- Integration of Results From TAILORx. *J Clin Oncol.* 2019; 37:1956–64. <https://doi.org/10.1200/JCO.19.00945>. [PubMed]
  30. Sestak I, Buus R, Cuzick J, Dubsy P, Kronenwett R, Denkert C, Ferree S, Sgroi D, Schnabel C, Baehner FL, Mallon E, Dowsett M. Comparison of the Performance of 6 Prognostic Signatures for Estrogen Receptor-Positive Breast Cancer: A Secondary Analysis of a Randomized Clinical Trial. *JAMA Oncol.* 2018; 4:545–53. <https://doi.org/10.1001/jamaoncol.2017.5524>. [PubMed]
  31. Bartlett JM, Bayani J, Marshall A, Dunn JA, Campbell A, Cunningham C, Sobol MS, Hall PS, Poole CJ, Cameron DA, Earl HM, Rea DW, Macpherson IR, et al, and OPTIMA TMG. Comparing Breast Cancer Multiparameter Tests in the OPTIMA Prelim Trial: No Test Is More Equal Than the Others. *J Natl Cancer Inst.* 2016; 108:djw050. <https://doi.org/10.1093/jnci/djw050>. [PubMed]
  32. Hochheiser L, Hornberger JC, Turner M, Lyman GH. Comparative analysis of multigene assays (MGA) effects on chemotherapy (CT) de-escalation for women with N0, ER+ early stage breast cancer (ESBC). *J Clin Oncol.* 2018; 36. [https://doi.org/10.1200/JCO.2018.36.15\\_suppl.e12519](https://doi.org/10.1200/JCO.2018.36.15_suppl.e12519).
  33. Mook S, Schmidt MK, Viale G, Pruneri G, Eekhout I, Floore A, Glas AM, Bogaerts J, Cardoso F, Piccart-Gebhart MJ, Rutgers ET, Van't Veer LJ, TRANSBIG Consortium. The 70-gene prognosis-signature predicts disease outcome in breast cancer patients with 1–3 positive lymph nodes in an independent validation study. *Breast Cancer Res Treat.* 2009; 116:295–302. <https://doi.org/10.1007/s10549-008-0130-2>. [PubMed]
  34. Hortobagyi GN, Shak S, Sledge GW Jr, Winer EP, Albain KS, Mamounas EP, Jakubowski DM, Petkov VI, Wolmark N. Breast cancer-specific mortality (BCSM) in patients (pts) with node-negative (N0) and node-positive (N+) breast cancer (BC) guided by the 21-gene assay: A SEER-genomic population-based study. San Antonio Breast cancer symposium 2018. <https://doi.org/10.1158/1538-7445.SABCS18-P3-11-02>.
  35. Stemmer SM, Steiner M, Rizel S, Soussan-Gutman L, Ben-Baruch N, Bareket-Samish A, Geffen DB, Nisenbaum B, Isaacs K, Fried G, Rosengarten O, Uziely B, Svedman C, et al. Clinical outcomes in patients with node-negative breast cancer treated based on the recurrence score results: evidence from a large prospectively designed registry. *NPJ Breast Cancer.* 2017; 3:33. <https://doi.org/10.1038/s41523-017-0034-6>. [PubMed]
  36. Stemmer SM, Steiner M, Rizel S, Geffen DB, Nisenbaum B, Peretz T, Soussan-Gutman L, Bareket-Samish A, Isaacs K, Rosengarten O, Fried G, McCullough D, Svedman C, et al. Clinical outcomes in ER+ HER2-node-positive breast cancer patients who were treated according to the Recurrence Score results: evidence from a large prospectively designed registry. *NPJ Breast Cancer.* 2017; 3:32. <https://doi.org/10.1038/s41523-017-0033-7>. [PubMed]
  37. Barni S, Cognetti F, Vassali L. PONDx: a perspective multicenter Italian survey of the 21-gene assay: impact on treatment selection in lobular breast cancer patients. *Tumori Journal.* 2018; 104:16–17.
  38. Waintraub SE, McNamara D, Graham DMA, Pecora AL, Min J, Wu T, Noh HG, Connors J, Pe Benito R, Choi K, Schultz E, Goldberg SL. Real-world economic value of a 21-gene assay in early-stage breast cancer. *Am J Manag Care.* 2017; 23:e416–e420. [PubMed]
  39. Chandler Y, Schechter CB, Jayasekera J, Near A, O'Neill SC, Isaacs C, Phelps CE, Ray GT, Lieu TA, Ramsey S, Mandelblatt JS. Cost Effectiveness of Gene Expression

- Profile Testing in Community Practice. *J Clin Oncol*. 2018; 36:554–62. <https://doi.org/10.1200/JCO.2017.74.5034>. [PubMed]
40. Lux MP, Nabieva N, Hildebrandt T, Rebscher H, Kümmel S, Blohmer JU, Schrauder MG. Budget impact analysis of gene expression tests to aid therapy decisions for breast cancer patients in Germany. *Breast*. 2018; 37:89–98. <https://doi.org/10.1016/j.breast.2017.11.002>. [PubMed]
  41. Martínez Del Prado P, Alvarez-López I, Domínguez-Fernández S, Plazaola A, Ibarrodo O, Galve-Calvo E, Ancizar-Lizarraga N, Gutierrez-Toribio M, Lahuerta-Martínez A, Mar J. Clinical and economic impact of the 21-gene recurrence score assay in adjuvant therapy decision making in patients with early-stage breast cancer: pooled analysis in 4 Basque Country university hospitals. *Clinicoecon Outcomes Res*. 2018; 10:189–99. <https://doi.org/10.2147/CEOR.S146095>. [PubMed]
  42. Markopoulos C, van de Velde C, Zarca D, Ozmen V, Masetti R. Clinical evidence supporting genomic tests in early breast cancer: Do all genomic tests provide the same information? *Eur J Surg Oncol*. 2017; 43:909–20. <https://doi.org/10.1016/j.ejso.2016.08.012>. [PubMed]
  43. IQWiG Report 2020. Biomarker-based tests to support the decision for or against adjuvant systemic chemotherapy in primary breast cancer – update to Commission D14-011. <https://www.iqwig.de/en/projects-results/projects/non-drug-interventions/d-projekte/d19-01-biomarker-based-tests-to-support-the-decision-for-or-against-adjuvant-systemic-chemotherapy-in-primary-breast-cancer-state-of-knowledge.12356.html>.
  44. “Tumour profiling tests to guide adjuvant chemotherapy decisions in 1057 people with breast cancer”; UK, NICE 2018. <https://www.nice.org.uk/guidance/dg34105843>.
  45. Burstein HJ, Curigliano G, Loibl S, Dubsy P, Gnant M, Poortmans P, Colleoni M, Denkert C, Piccart-Gebhart M, Regan M, Senn HJ, Winer EP, Thurlimann B, and Members of the St. Gallen International Consensus Panel on the Primary Therapy of Early Breast Cancer 2019. Estimating the benefits of therapy for early-stage breast cancer: the St. Gallen International Consensus Guidelines for the primary therapy of early breast cancer 2019. *Ann Oncol*. 2019; 30:1541–57. <https://doi.org/10.1093/annonc/mdz235>. [PubMed]
  46. Cardoso F, Kyriakides S, Ohno S, Penault-Llorca F, Poortmans P, Rubio IT, Zackrisson S, Senkus E, ESMO Guidelines Committee. Early breast cancer: ESMO Clinical Practice Guidelines for diagnosis, treatment and follow-up†. *Ann Oncol*. 2019; 30:1194–220. <https://doi.org/10.1093/annonc/mdz189>. [PubMed]
  47. Amin MB, Greene FL, Edge SB, Compton CC, Gershengwald JE, Brookland RK, Meyer L, Gress DM, Byrd DR, Winchester DP. The Eighth Edition AJCC Cancer Staging Manual: Continuing to build a bridge from a population-based to a more “personalized” approach to cancer staging. *CA Cancer J Clin*. 2017; 67:93–99. <https://doi.org/10.3322/caac.21388>. [PubMed]
  48. National Comprehensive Cancer Network. Breast Cancer, version 6 2020, September 8 2020. [https://www.nccn.org/professionals/physician\\_gls/pdf/breast.pdf](https://www.nccn.org/professionals/physician_gls/pdf/breast.pdf).
  49. Agenas 2019 report: Test prognostici multigenici (TPM) per guidare la decisione sulla chemioterapia adiuvante nel trattamento del tumore al seno in stadio precoce. Document for public consultation. [http://www.ministerosalute.it/imgs/C\\_17\\_pagineAree\\_5204\\_listaFile\\_itemName\\_2\\_file.pdf](http://www.ministerosalute.it/imgs/C_17_pagineAree_5204_listaFile_itemName_2_file.pdf).
